# Supplementary material for: Syntheses, crystal structures and physical properties of three new chalcogenides: NaGaGe3Se8, K3Ga3Ge7S20, and K3Ga3Ge7Se20
Source: Royal Society of Chemistry journal article supplement (doi:10.1039/c5dt03682h), 2015-11-09
Supplement: c5dt03682h1.pdf [file c5dt03682h1.pdf]

## Electronic Supplementary Information (ESI)

### Syntheses, Crystal Structures and Physical Properties of Three New Chalcogenides: $\text{NaGaGe}_3\text{Se}_8$ , $\text{K}_3\text{Ga}_3\text{Ge}_7\text{S}_{20}$ , and $\text{K}_3\text{Ga}_3\text{Ge}_7\text{Se}_{20}^\dagger$

Xiaoshuang Li,<sup>abc</sup> Chao Li,<sup>abc</sup> Pifu Gong,<sup>abc</sup> Zheshuai Lin,<sup>ac</sup> Jiyong Yao,<sup>ab,\*</sup> and  
Yicheng Wu<sup>ab</sup>

<sup>a</sup> *Center for Crystal Research and Development, Technical Institute of Physics and  
Chemistry, Chinese Academy of Sciences, Beijing 100190, P.R. China*

<sup>b</sup> *Key Laboratory of Functional Crystals and Laser Technology, Technical Institute of  
Physics and Chemistry, Chinese Academy of Sciences, Beijing 100190, China*

<sup>c</sup> *University of Chinese Academy of Sciences, Beijing 100049, China*

*\* To whom correspondence should be addressed*

*Email: [jyao@mail.ipc.ac.cn](mailto:jyao@mail.ipc.ac.cn) (Jiyong Yao)*

*Tel: 86-10-82543725; Fax: 86-10-82543725*

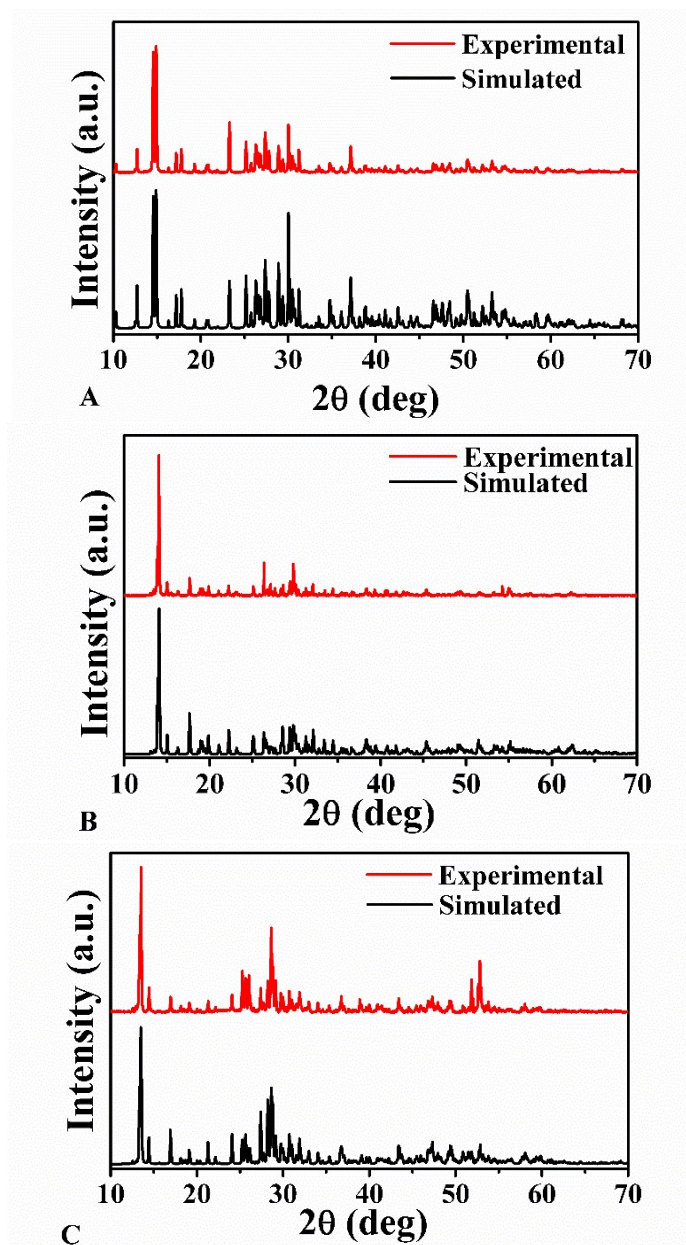

**Fig. S1.** Experimental (red) and simulated (black) X-ray powder diffraction data of NaGaGe<sub>3</sub>Se<sub>8</sub>, K<sub>3</sub>Ga<sub>3</sub>Ge<sub>7</sub>S<sub>20</sub>, and K<sub>3</sub>Ga<sub>3</sub>Ge<sub>7</sub>Se<sub>20</sub>. A: NaGaGe<sub>3</sub>Se<sub>8</sub>, B: K<sub>3</sub>Ga<sub>3</sub>Ge<sub>7</sub>S<sub>20</sub>, C: K<sub>3</sub>Ga<sub>3</sub>Ge<sub>7</sub>Se<sub>20</sub>.
